# Supplementary material for: Adsorption of alcohols and hydrocarbons on nonstoichiometric cementite{010} surfaces
Source: Royal Society of Chemistry journal article supplement (doi:10.1039/c8cp01028e), 2018-01-01
Supplement: c8cp01028e2.pdf [file c8cp01028e2.pdf]

## Supplementary information for "Adsorption of alcohols and hydrocarbons on nonstoichiometric cementite {010} surfaces."

David Muñoz Ramo\*

*Department of Engineering, University of Cambridge,  
J. J. Thomson Road, Cambridge CB3 0FA, UK.*

Stephen J. Jenkins†

*Department of Chemistry, University of Cambridge,  
Lensfield Road, Cambridge CB2 1EW, UK.*

We show in Figures 1-9 other local minima found in our simulations for several molecules adsorbed over nonstoichiometric cementite {010}. These configurations are higher in energy than the configurations shown in the main paper. Tables I and II show the adsorption energies corresponding to the local minima pictured in this document.

---

\*Electronic address: [dm586@cam.ac.uk](mailto:dm586@cam.ac.uk)

†Electronic address: [sjj24@cam.ac.uk](mailto:sjj24@cam.ac.uk)

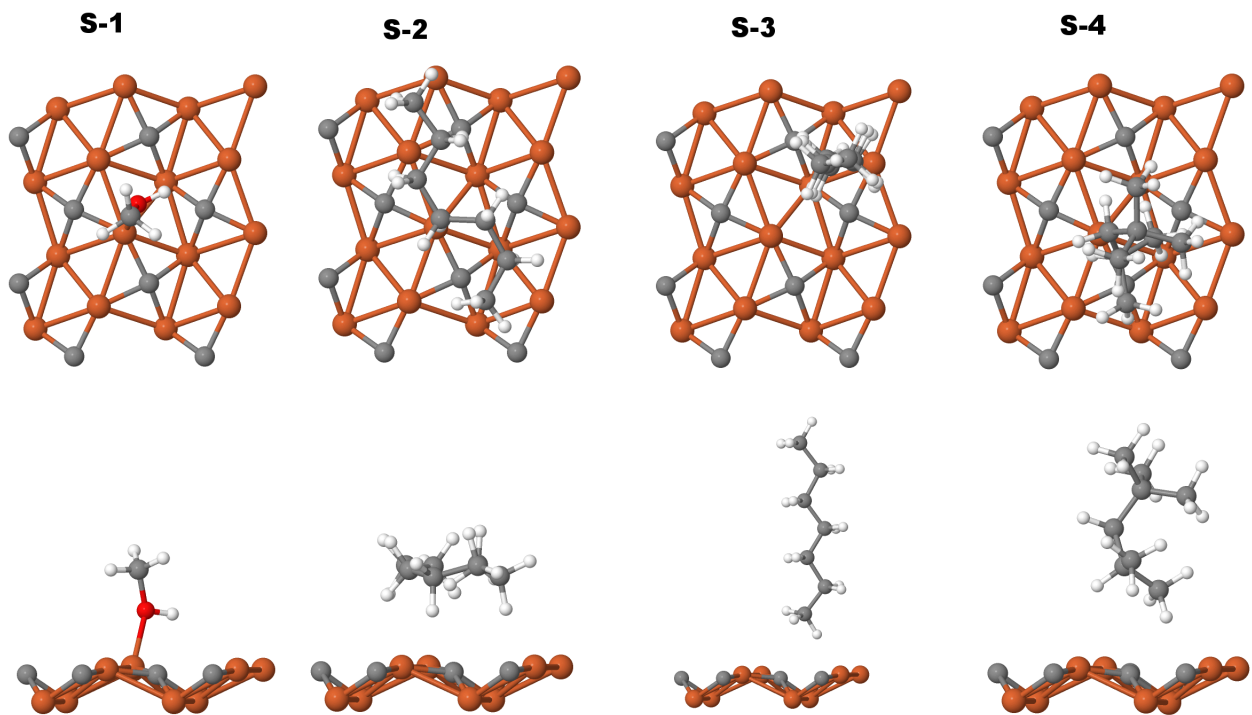

FIG. 1: Detail of the local minima found for the adsorption of noncyclic hydrocarbons on nonstoichiometric cementite  $\{010\}$ . For each configuration, the top picture shows the view from the top, and the bottom picture shows a side view.

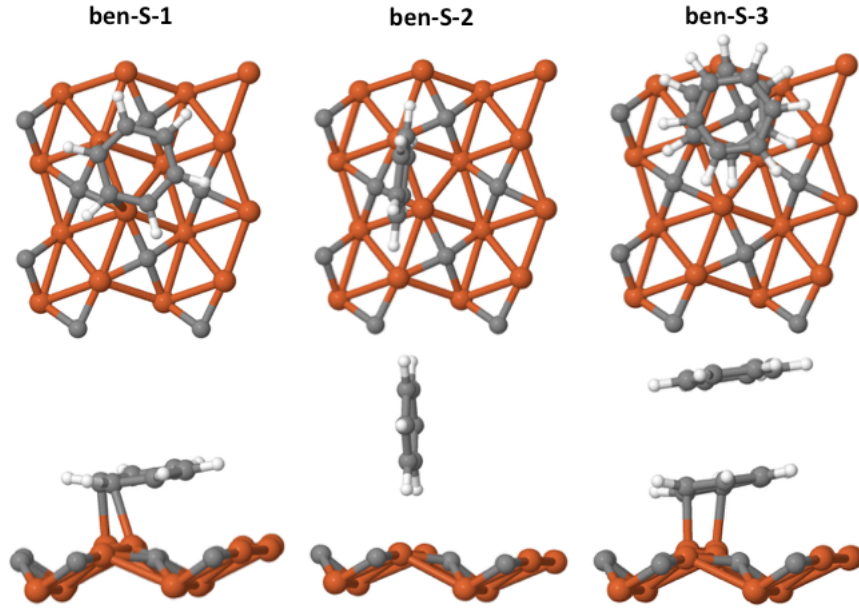

FIG. 2: Detail of the local minima found for the adsorption of benzene on nonstoichiometric cementite {010}. For each configuration, the top picture shows the view from the top, and the bottom picture shows a side view.

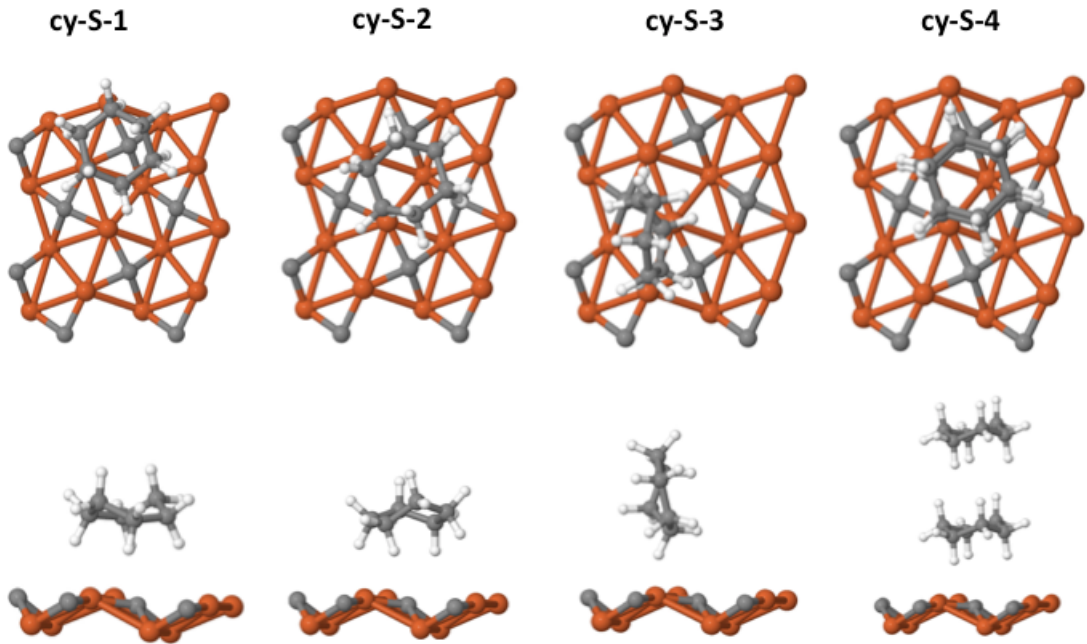

FIG. 3: Detail of the local minima found for the adsorption of cyclohexane on nonstoichiometric cementite {010}. For each configuration, the top picture shows the view from the top, and the bottom picture shows a side view.

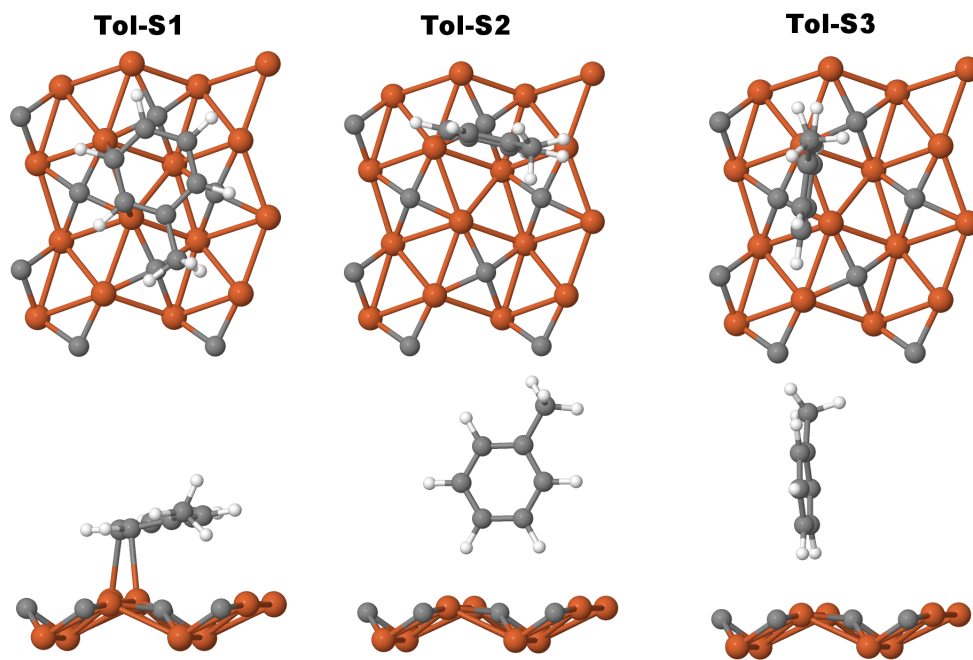

FIG. 4: Detail of the local minima found for the adsorption of toluene on nonstoichiometric cementite  $\{010\}$  at low coverage. For each configuration, the top picture shows the view from the top, and the bottom picture shows a side view.

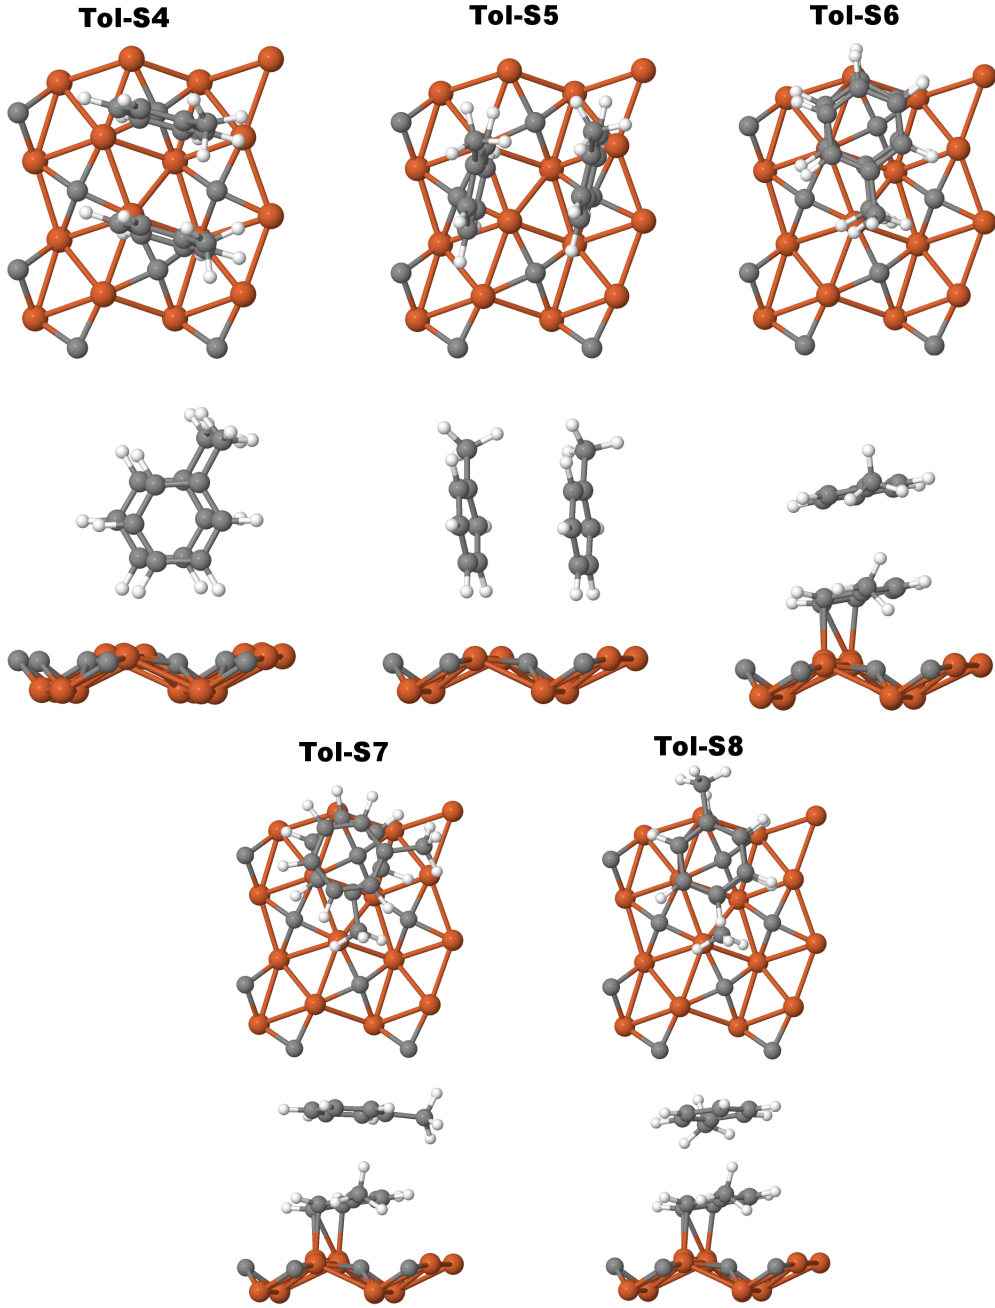

FIG. 5: Detail of the local minima found for the adsorption of toluene on nonstoichiometric cementite  $\{010\}$  at high coverage. For each configuration, the top picture shows the view from the top, and the bottom picture shows a side view.

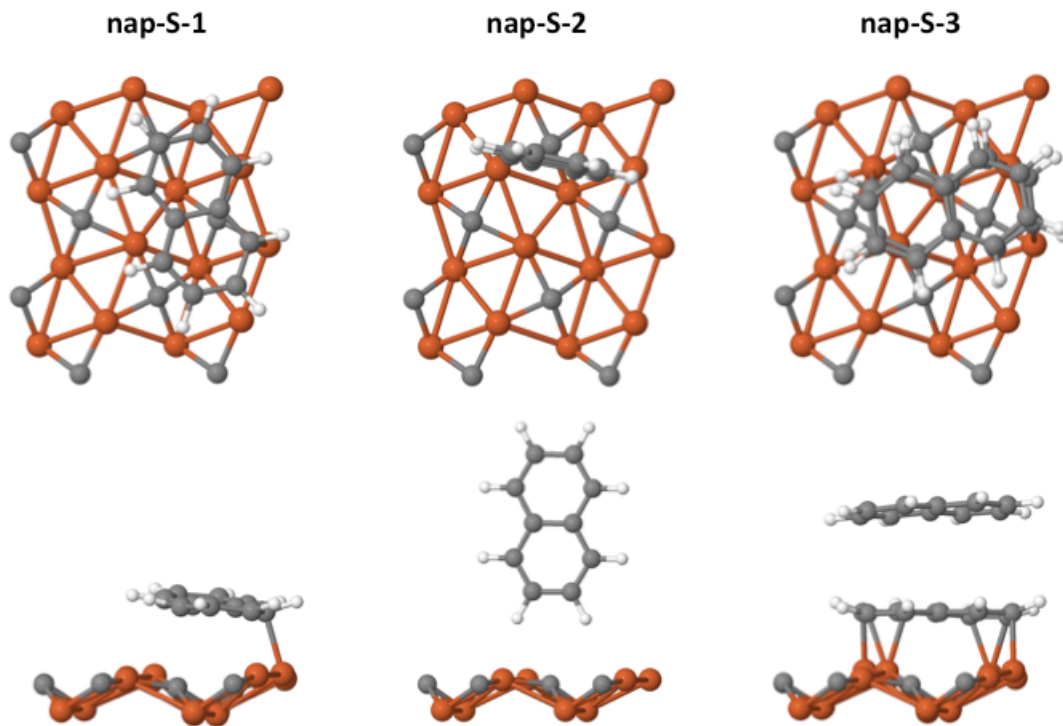

FIG. 6: Detail of the local minima found for the adsorption of naphthalene on nonstoichiometric cementite  $\{010\}$ . For each configuration, the top picture shows the view from the top, and the bottom picture shows a side view.

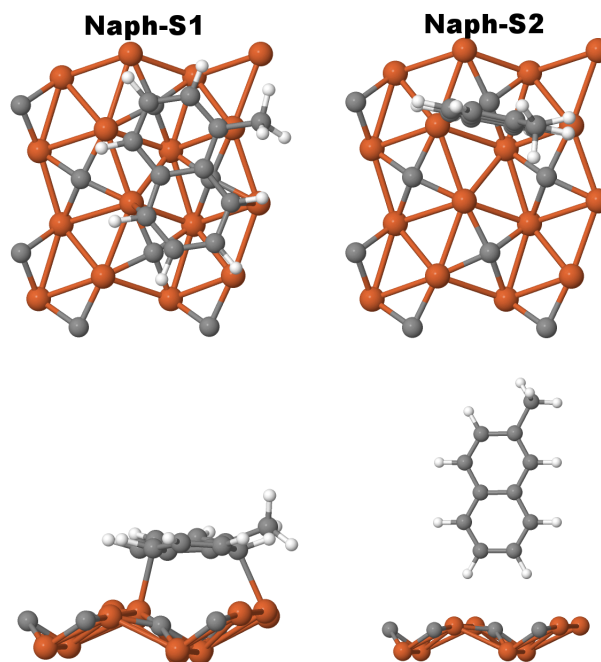

FIG. 7: Detail of the local minima found for the adsorption of 1-methylnaphthalene on nonstoichiometric cementite  $\{010\}$  at low coverage. For each configuration, the top picture shows the view from the top, and the bottom picture shows a side view.

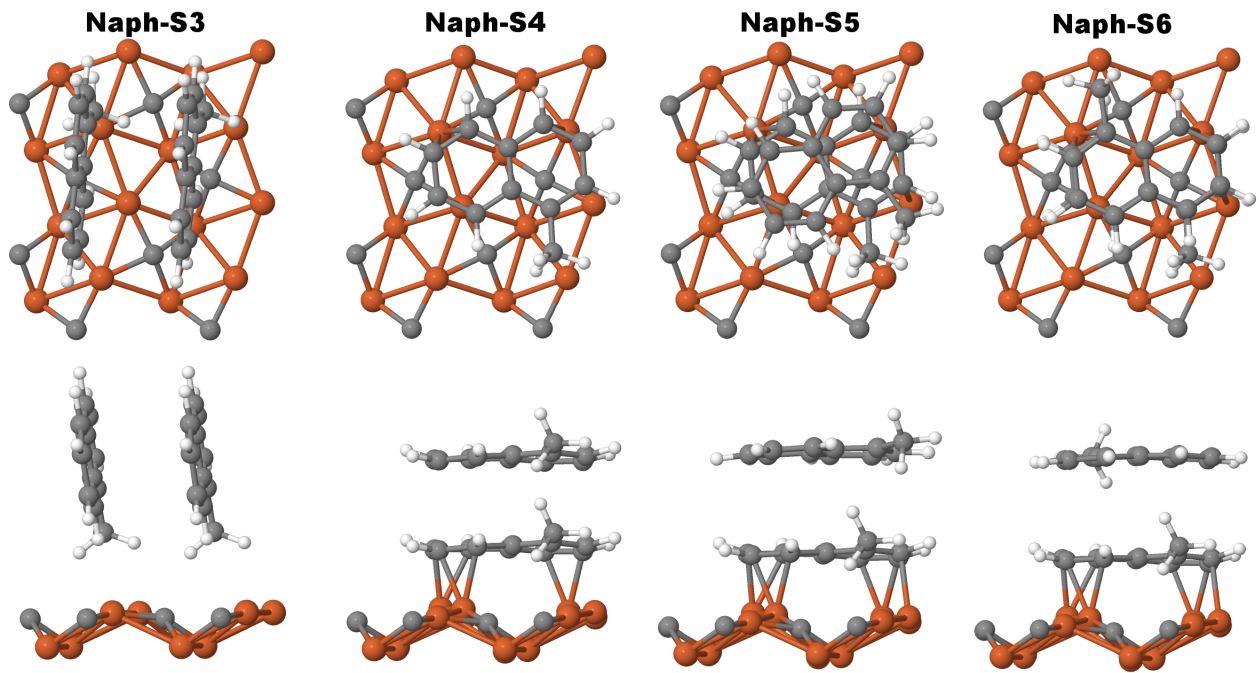

FIG. 8: Detail of the local minima found for the adsorption of 1-methylnaphthalene on nonstoichiometric cementite  $\{010\}$  at high coverage. For each configuration, the top picture shows the view from the top, and the bottom picture shows a side view.



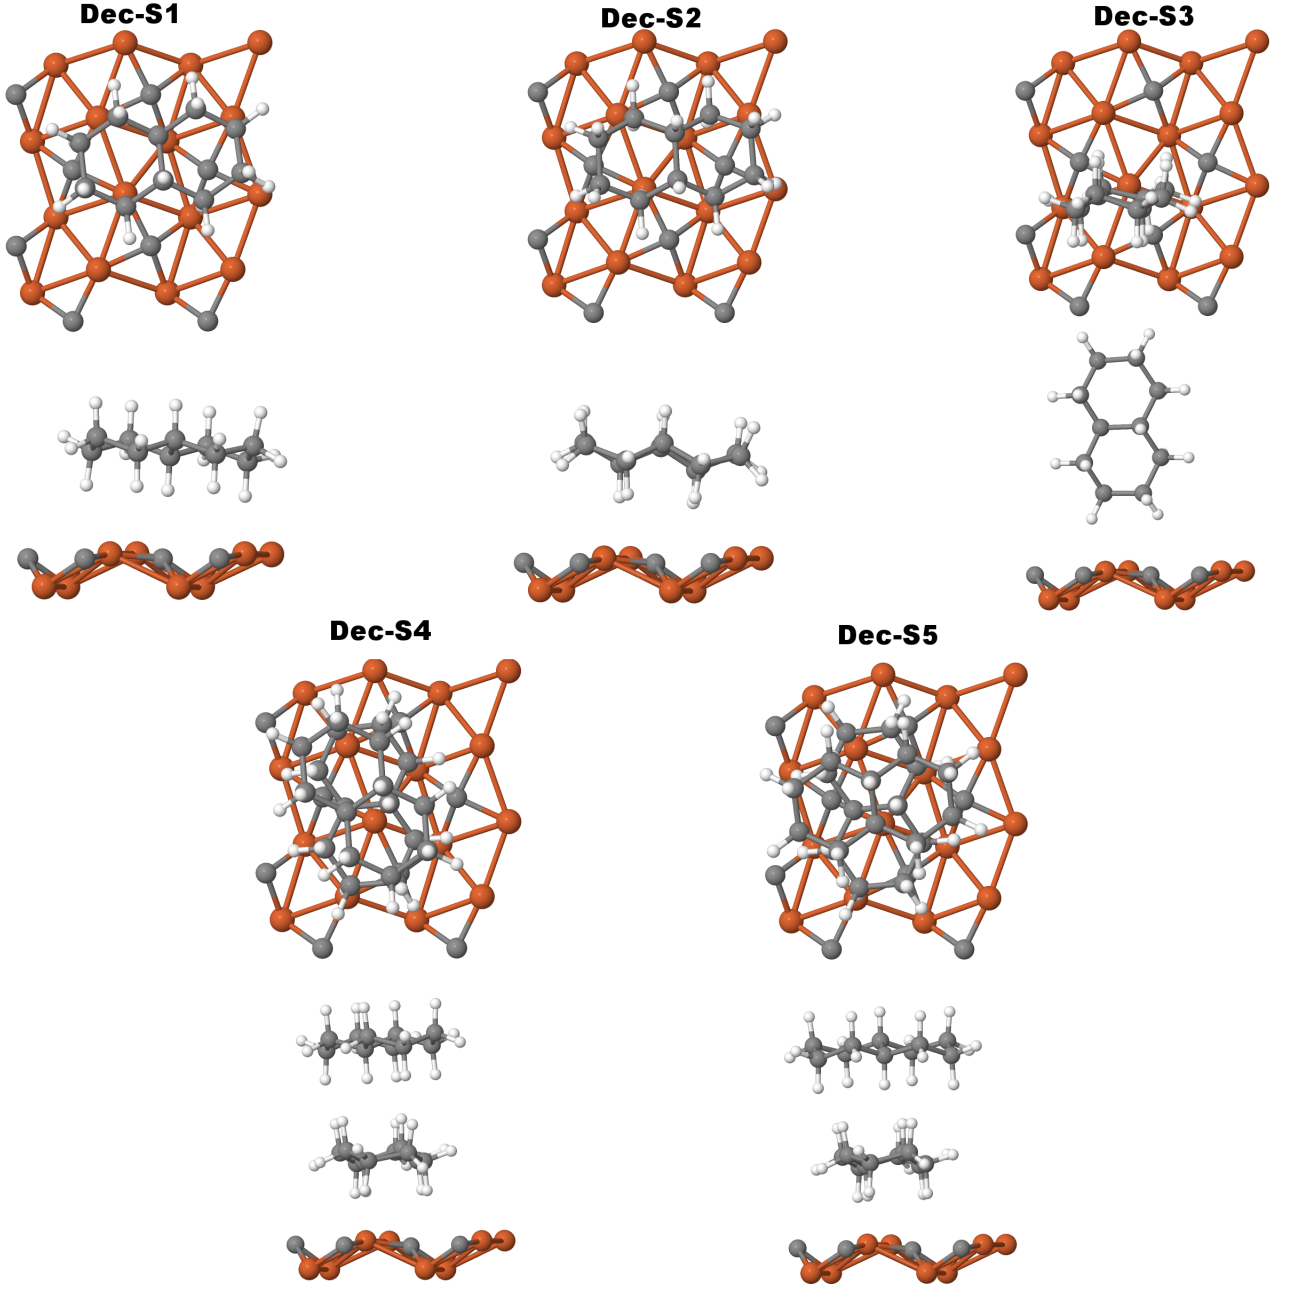

FIG. 9: Detail of the local minima found for the adsorption of decalin on nonstoichiometric cementite  $\{010\}$ . For each configuration, the top picture shows the view from the top, and the bottom picture shows a side view.

TABLE I: Adsorption energies for the local minima found for the nonaromatic organic molecules considered in this study. All energies are given in eV.

| Configuration     | Adsorption energy |
|-------------------|-------------------|
| Methanol          |                   |
| S-1               | -0.97             |
| <i>n</i> -heptane |                   |
| S-2               | -1.51             |
| S-3               | -0.61             |
| Isooctane         |                   |
| S-4               | -0.64             |
| Cyclohexane       |                   |
| Cy-S1             | -1.08             |
| Cy-S2             | -1.35             |
| Cy-S3             | -0.42             |
| Cy-S4             | -1.52             |
| Decalin           |                   |
| Dec-S1            | -2.03             |
| Dec-S2            | -2.09             |
| Dec-S3            | -0.89             |
| Dec-S4            | -2.75             |
| Dec-S5            | -2.78             |

TABLE II: Adsorption energies for the local minima found for the aromatic organic molecules considered in this study. All energies are given in eV.

| Configuration       | Adsorption energy |
|---------------------|-------------------|
| Benzene             |                   |
| Ben-S1              | -1.74             |
| Ben-S2              | -0.53             |
| Ben-S3              | -2.36             |
| Toluene             |                   |
| Tol-S1              | -1.83             |
| Tol-S2              | -0.66             |
| Tol-S3              | -0.62             |
| Tol-S4              | -1.59             |
| Tol-S5              | -1.63             |
| Tol-S6              | -2.70             |
| Tol-S7              | -2.74             |
| Tol-S8              | -2.71             |
| naphthalene         |                   |
| Nap-S1              | -2.44             |
| Nap-S2              | -0.65             |
| Nap-S3              | -4.10             |
| 1-methylnaphthalene |                   |
| Naph-S1             | -2.43             |
| Naph-S2             | -0.76             |
| Naph-S3             | -2.61             |
| Naph-S4             | -4.36             |
| Naph-S5             | -4.40             |
| Naph-S6             | -4.40             |
